# Supplementary material for: Post-tuberculosis lung impairment: systematic review and meta-analysis of spirometry data from 14 621 people
Source: PubMed Central journal article supplement — Eur Respir Rev. 2023 Apr 19;32(168):220221. doi: 10.1183/16000617.0221-2022 (PMC10113954; doi:10.1183/16000617.0221-2022), 2023-04-19
Supplement: ERR-0221-2022.SUPPLEMENT1.pdf [file ERR-0221-2022.SUPPLEMENT1.pdf]

## Supplement 1

### Search terms

#### PubMed

tuberculosis AND (lung outcome OR lung dysfunction OR respiratory symptom OR lung sequelae OR TB sequelae OR pulmonary outcome OR lung function OR pulmonary function OR respiratory function OR lung impairment OR pulmonary impairment OR pulmonary disease OR lung damage OR lung disease OR obstruction OR restriction OR COPD OR chronic obstructive pulmonary disease OR vital capacity OR spirometric restriction OR spirometric obstruction OR expiratory flow OR respiratory disease OR chronic respiratory signs OR breathing problem) AND (spirometry OR six minute walk OR walking test OR walk test OR St. George's Respiratory Questionnaire OR SGRQ OR lung function assessment OR lung function measurement OR COPD assessment test OR COPD Questionnaire OR obstructive lung disease questionnaire OR lung function questionnaire)
