# Supplementary material for: Post-tuberculosis lung impairment: systematic review and meta-analysis of spirometry data from 14 621 people
Source: PubMed Central journal article supplement — Eur Respir Rev. 2023 Apr 19;32(168):220221. doi: 10.1183/16000617.0221-2022 (PMC10113954; doi:10.1183/16000617.0221-2022), 2023-04-19
Supplement: ERR-0221-2022.SUPPLEMENT2.pdf [file ERR-0221-2022.SUPPLEMENT2.pdf]

## Supplement 2

### Characteristics of the selected studies

| N  | Author        | Year | WHO Region      | Country                   | ST | S   | Male (%) | Age* | TB Type | SM (%) | FEV1 (%) | FVC (%) | FEV/FVC* (%) | FEV1 (L) | FVC (L) | OB (%) | R (%) | MIX (%) | NS (%) | NOR (%) | NOS* |
|----|---------------|------|-----------------|---------------------------|----|-----|----------|------|---------|--------|----------|---------|--------------|----------|---------|--------|-------|---------|--------|---------|------|
| 1  | Akkara        | 2013 | South-East Asia | India                     | PS | 257 | 74.0     | 35   | TB      | 0      | NA       | NA      | NA           | NA       | NA      | 86.8   | NA    | NA      | NA     | 13.2    | M    |
| 2  | Allwood       | 2020 | Africa          | South Africa              | PS | 43  | 37.2     | 26   | DS      | 72.1   | 79       | 81      | 87.6         | 2.5      | 3       | NA     | NA    | NA      | NA     | NA      | M    |
| 3  | Bález-Saldaña | 2013 | Americas        | Mexico                    | PS | 127 | 43       | 48   | TB      | 0      | 83.3     | 90.8    | 79           | 2.1      | 2.8     | 24     | 17    | NA      | NA     | 59      | G    |
| 4  | Baig          | 2010 | South-East Asia | Pakistan                  | PS | 47  | 76.5     | 53.5 | TB      | 0      | NA       | NA      | NA           | NA       | NA      | 55.3   | 29.9  | 14.8    | NA     | 0       | M    |
| 5  | Banu Rekha    | 2009 | South-East Asia | India                     | PS | 148 | 66       | NA   | DS      | 33     | NA       | NA      | NA           | NA       | NA      | 5      | 45    | 16      | NA     | 35      | M    |
| 6  | Bemba         | 2017 | Africa          | The Republic of the Congo | PS | 150 | 61.3     | 34   | TB      | 21.3   | NA       | NA      | NA           | 2.2      | 2.8     | 6.7    | 51.3  | 10.7    | NA     | 3.3     | G    |
| 7  | Chin          | 2019 | Africa          | Zimbabwe                  | PS | 138 | 59       | 39   | MDR     | 53     | 85       | 89      | 96           | NA       | NA      | 17     | 18    | NA      | NA     | 65      | M    |
| 8  | Chung         | 2011 | Western Pacific | Taiwan                    | PS | 106 | 75.5     | 59.3 | TB      | 48.1   | 77.3     | 87.9    | 70.4         | 1.9      | 2.7     | 48.6   | 9.3   | 9.3     | NA     | 32.9    | G    |
| 9  | Chushkin      | 2017 | Europe          | Russia                    | PS | 214 | 62       | 51.1 | TB      | 64.5   | 87.1     | 99.7    | 70.3         | NA       | NA      | 34.6   | 8.4   | 3.7     | 0.9    | 52.4    | G    |
| 10 | Daniels       | 2019 | Africa          | South Africa              | PS | 45  | 56       | 39.9 | TB      | 78     | 91       | 83.2    | 93.7         | NA       | NA      | 21     | 25    | 2       | 0      | 52      | M    |
| 11 | de la Mora    | 2015 | Americas        | Mexico                    | PS | 70  | 27       | 40   | DS/MDR  | NA     | 58.4     | 62.1    | NA           | NA       | NA      | NA     | NA    | NA      | NA     | NA      | M    |
| 12 | de Valliere   | 2004 | Africa          | South Africa              | PS | 33  | 76       | 40.2 | MDR     | NA     | NA       | 63      | NA           | NA       | NA      | 12     | 42    | 39      | NA     | 6       | G    |
| 13 | Dhipu Mathew  | 2016 | South-East Asia | India                     | PS | 75  | 68       | 54.5 | TB      | NA     | 51.3     | 57.4    | 89.7         | NA       | NA      | 13.3   | 68    | 18.7    | NA     | 0       | G    |
| 14 | Di Naso (DS)  | 2011 | Americas        | Brazil                    | PS | 15  | 80       | 32.9 | DS      | 60     | 66.1     | 72.1    | 77.1         | NA       | NA      | 33.3   | 20    | 26.7    | NA     | 20      | M    |
|    | 12            |      |                 |                           |    | 50  | 38.7     | MDR  | 58      | 33.1   | 43.6     | 61.8    | NA           | NA       | 25      | NA     | 75    | NA      | 0      |         |      |
| 15 | Fiogbe        | 2019 | Africa          | Benin                     | PS | 189 | 68       | 37   | TB (DS) | 20.1   | NA       | NA      | 81           | 2.4      | 3.1     | 32.8   | 9.5   | 2.6     | NA     | 55      | G    |

|    |                  |      |                 |                                                       |    |          |      |      |        |      |      |      |      |     |     |      |      |      |     |      |   |
|----|------------------|------|-----------------|-------------------------------------------------------|----|----------|------|------|--------|------|------|------|------|-----|-----|------|------|------|-----|------|---|
| 16 | Gandhi           | 2016 | South-East Asia | India                                                 | PS | 146      | 65.8 | 34.5 | TB     | 28.1 | 66.9 | 74.6 | 76.3 | NA  | NA  | 8.2  | 43.8 | 13   | 8.9 | 26   | M |
| 17 | Godoy            | 2012 | Americas        | Brazil                                                | PS | 18       | 67   | 43.7 | MDR    | 67   | 76.8 | 87.2 | 73.4 | NA  | NA  | 39   | 22   | 17   | NA  | 22   | G |
| 18 | Gupte            | 2019 | South-East Asia | India                                                 | PS | 172      | 52   | 32   | DS     | 20   | 70   | 73   | NA   | NA  | NA  | 24   | 52   | NA   | 23  | NA   | G |
| 19 | Hwang            | 2014 | Western Pacific | South Korea                                           | PB | 167      | 64.1 | 51   | TB     | 37.2 | 90   | 95   | 73.8 | 2.8 | 3.8 | 26.3 | NA   | NA   | NA  | NA   | M |
| 20 | Jones            | 2017 | Africa          | Uganda                                                | PS | 29       | 48   | 45   | TB     | 34.5 | 58.1 | 72   | 67   | 1.4 | 2.1 | 48.2 | 34.4 | NA   | NA  | 17.2 | G |
| 21 | Khosa            | 2020 | Africa          | Mozambique                                            | PS | 62       | 67.7 | 29.5 | DS     | 35.5 | 74.8 | 75.5 | 79.4 | 2.4 | 3   | 1.6  | 50   | 12.9 | 0   | 35.5 | G |
| 22 | Kim              | 2017 | Western Pacific | South Korea                                           | PB | 148<br>2 | 60.2 | 57.4 | TB     | 56.5 | 85.3 | 89.3 | 73   | 2.6 | 3.5 | 29.6 | 14   | 0    | 0   | 56.4 | G |
| 23 | Ko               | 2015 | Western Pacific | South Korea                                           | PS | 41       | 78   | 62   | DS/MDR | 56   | 72.8 | 85.8 | 66   | 1.9 | 2.9 | NA   | NA   | NA   | NA  | NA   | G |
| 24 | Lam              | 2010 | Western Pacific | China                                                 | PB | 218<br>6 | 38.7 | 64.5 | TB     | 31.7 | 89   | NA   | NA   | NA  | NA  | 8.6  | NA   | NA   | NA  | NA   | G |
| 25 | Lee              | 2011 | Western Pacific | South Korea                                           | PB | 294      | 62.6 | 53.3 | TB     | 53.1 | 89.5 | 94.9 | 74.3 | 2.8 | 3.8 | 30.3 | NA   | NA   | NA  | NA   | G |
| 26 | Long             | 1998 | Americas        | Canada                                                | PS | 25       | 76   | 36   | DS     | 64   | 97   | 98   | 75   | NA  | NA  | NA   | NA   | NA   | NA  | NA   | M |
| 27 | Maguire          | 2009 | South-East Asia | Indonesia                                             | PS | 69       | 66.7 | 29.1 | DS/MDR | 59.4 | 78.6 | 85.3 | NA   | NA  | NA  | NA   | NA   | NA   | NA  | NA   | M |
| 28 | Mancuzo          | 2020 | Americas        | Brazil                                                | PS | 378      | 52.1 | 40   | TB     | 39.4 | 77.6 | 83.7 | 75.5 | 2.5 | 3.3 | 27   | 18.3 | 17.7 | 0   | 37   | L |
| 29 | Manji            | 2016 | Africa          | Tanzania                                              | PS | 501      | 60.5 | 35   | TB     | 29.3 | NA   | NA   | 63   | 1.8 | 3   | 42   | 13   | 19   | NA  | 26   | G |
| 30 | Mattila          | 2016 | Europe          | Finland                                               | PB | 119<br>1 | 56   | NA   | TB     | 52.4 | NA   | NA   | NA   | NA  | NA  | 9.7  | NA   | NA   | NA  | NA   | M |
| 31 | Mbatchou Ngahane | 2016 | Africa          | Cameroon                                              | PS | 269      | 54.3 | 33   | DS     | 10   | NA   | NA   | NA   | NA  | NA  | 4.1  | 36.1 | 5.2  | NA  | 54.6 | G |
| 32 | Meghji           | 2020 | Africa          | Malawi                                                | PS | 405      | 67.9 | 35   | DS     | 29.6 | NA   | NA   | NA   | NA  | NA  | 17.9 | 12.8 | 0    | 0   | 69.4 | G |
| 33 | Menezes          | 2007 | Americas        | Brazil,<br>Mexico,<br>Uruguay,<br>Chile,<br>Venezuela | PB | 132      | 39   | 56.6 | TB     | 57   | 91.4 | 96.1 | 91.8 | 2.3 | 3.1 | 30.7 | NA   | NA   | NA  | NA   | G |

|    |             |      |                 |              |    |      |      |      |        |      |      |      |      |     |     |      |      |      |    |      |   |
|----|-------------|------|-----------------|--------------|----|------|------|------|--------|------|------|------|------|-----|-----|------|------|------|----|------|---|
| 34 | Nihues Sde  | 2015 | Americas        | Brazil       | PB | 100  | 52.5 | 40   | TB     | 51.5 | 86   | 87.5 | 87.5 | NA  | NA  | 20   | 2    | 19   | NA | 59   | M |
| 35 | Nuwagira    | 2020 | Africa          | Uganda       | PS | 95   | 60   | 39   | MDR    | 25   | 74.9 | 81.9 | 78   | 2.1 | 2.9 | 31   | NA   | NA   | NA | NA   | G |
| 36 | Ojuawo      | 2020 | Africa          | Nigeria      | PS | 308  | 55.8 | 39.3 | TB     | NA   | NA   | NA   | NA   | NA  | NA  | 5.8  | 42.2 | 24   | NA | 28   | G |
| 37 | Osman       | 2016 | Africa          | Sudan        | PS | 136  | 73   | 44   | TB     | NA   | 76.3 | 69   | 92   | 2.7 | 3   | 8.8  | 5    | NA   | NA | NA   | G |
| 38 | Pasipanodya | 2007 | Americas        | USA          | PS | 107  | 69   | 47   | TB     | 57   | 77.8 | 82.8 | 76.1 | NA  | NA  | 15   | 31   | 13   | NA | 41   | G |
| 39 | Pasipanodya | 2012 | Americas        | USA          | PS | 317  | 70.2 | 47   | TB     | 55   | 81   | 82.3 | 81.2 | NA  | NA  | 10.7 | 73.3 | 16   | NA | NA   | M |
| 40 | Patil       | 2018 | South-East Asia | India        | PS | 1000 | 60   | 45   | DS     | 0    | NA   | NA   | NA   | NA  | NA  | 37   | 9    | 16   | NA | 38   | G |
| 41 | Pefura-Yone | 2014 | Africa          | Cameroon     | PS | 177  | 57.1 | 32   | DS     | 19.8 | 76.3 | 74.8 | 86   | NA  | NA  | NA   | NA   | NA   | NA | NA   | G |
| 42 | Plit        | 1998 | Africa          | South Africa | PS | 74   | 70.3 | 35   | DS     | 58   | 76.4 | 87.9 | 77   | 2.3 | 3   | 28   | 24   | NA   | NA | 47   | M |
| 43 | Powers      | 2020 | Americas        | USA          | PB | 344  | 44.3 | 60.8 | TB     | 70.9 | 88.5 | 91.1 | 75.6 | NA  | NA  | 9.6  | 8.7  | NA   | NA | NA   | G |
| 44 | Ralph       | 2013 | South-East Asia | Indonesia    | PS | 112  | 65.5 | 28   | DS/MDR | 55   | 71   | NA   | NA   | 2   | NA  | NA   | NA   | NA   | NA | NA   | M |
| 45 | Ramos       | 2006 | Americas        | Brazil       | PS | 50   | 40   | 30   | TB     | 46   | NA   | NA   | NA   | NA  | NA  | 24   | 18   | 34   | NA | 24   | M |
| 46 | Rhee        | 2013 | Western Pacific | South Korea  | PS | 595  | 60.5 | 65.6 | TB     | 43.1 | 49   | 61.3 | 58   | 1.2 | 2   | 76.8 | NA   | NA   | NA | NA   | G |
| 47 | Santra      | 2017 | South-East Asia | India        | PS | 138  | 84   | 53.4 | TB     | 43.5 | 50.5 | 69.7 | NA   | 1.1 | NA  | 27.5 | NA   | 72.5 | NA | NA   | M |
| 48 | Singla      | 2009 | South-East Asia | India        | PS | 47   | 55.6 | 33.5 | MDR    | 32   | 53.3 | 68.1 | 66.2 | 1.7 | 2.6 | 11   | 19   | 66   | NA | 4    | M |
| 49 | Singla      | 2018 | South-East Asia | India        | PS | 46   | 54   | 26.7 | MDR    | 9    | 56.1 | NA   | NA   | NA  | NA  | 10   | 24   | 64   | NA | 2    | G |
| 50 | Snider      | 1971 | Americas        | USA          | PS | 1403 | 68   | 44.7 | TB     | 83.5 | 72.8 | 83.1 | 71   | NA  | NA  | 23.2 | 24.4 | 18.6 | NA | 33.7 | G |
| 51 | Stek        | 2020 | Africa          | South Africa | PS | 111  | 59   | 38   | DS     | 50   | 83.9 | NA   | NA   | NA  | NA  | 9.7  | 38.6 | NA   | NA | 47.4 | G |
| 52 | Vashakidze  | 2019 | Europe          | Georgia      | PS | 31   | 57   | 31   | MDR    | 40   | 63   | 81   | NA   | NA  | NA  | NA   | NA   | NA   | NA | NA   | G |
| 53 | Vecino      | 2011 | Americas        | USA          | PS | 123  | 71   | 48   | DS/MDR | NA   | NA   | NA   | NA   | NA  | NA  | 22   | 16   | 14   | NA | 48   | M |

|    |         |      |        |              |    |    |    |    |    |    |    |    |    |    |    |    |    |    |    |    |   |
|----|---------|------|--------|--------------|----|----|----|----|----|----|----|----|----|----|----|----|----|----|----|----|---|
| 54 | Willcox | 1989 | Africa | South Africa | PS | 71 | 66 | 50 | TB | NA | NA | NA | NA | NA | NA | 48 | 17 | 20 | NA | 15 | M |
|----|---------|------|--------|--------------|----|----|----|----|----|----|----|----|----|----|----|----|----|----|----|----|---|

*Abbreviations:* ST – study type (PS – patient series; PB – population-based); S – sample size; SM – smoking; OB – obstruction; R – restriction; MIX – mixed; NOR- normal; NS – not specified; QUAL – quality (G – good; M - moderate; L - low); RT - retreatment; DS – drug-susceptible tuberculosis; MDR – multidrug- resistant tuberculosis; NA – non-available or not-applicable

*Note\*:* Age (mean or median); FEV1/FVC ratio when reported in absolute numbers was converted to %; NOS: A “star system” was used to place publications in three categories – low, moderate and good. A sum of eight or nine stars indicated a high-quality study, while a sum of six or seven and less than six stars indicated moderate and low study quality, respectively. A study with no stars in one category was always considered of low quality.
