# Supplementary material for: Post-tuberculosis lung impairment: systematic review and meta-analysis of spirometry data from 14 621 people
Source: PubMed Central journal article supplement — Eur Respir Rev. 2023 Apr 19;32(168):220221. doi: 10.1183/16000617.0221-2022 (PMC10113954; doi:10.1183/16000617.0221-2022), 2023-04-19

## Supplement 3

**Figure A. Drug-susceptible tuberculosis patient series vs drug-susceptible tuberculosis population-based studies for % of predicted FEV1**

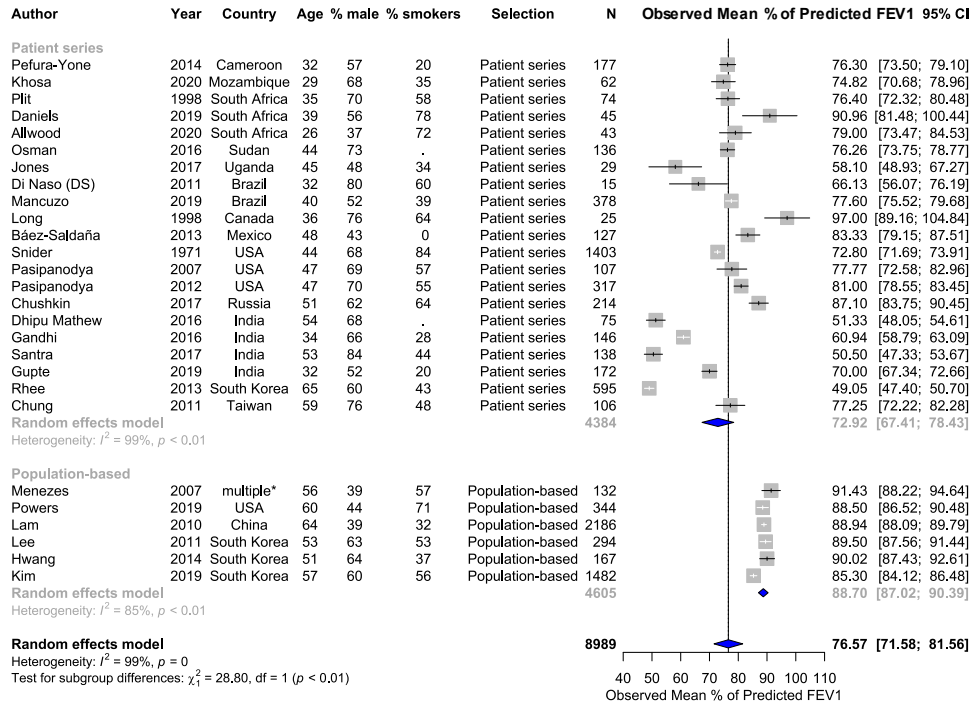

**Figure B.** Drug-susceptible tuberculosis patient series vs drug-susceptible tuberculosis population-based studies for % of predicted FVC

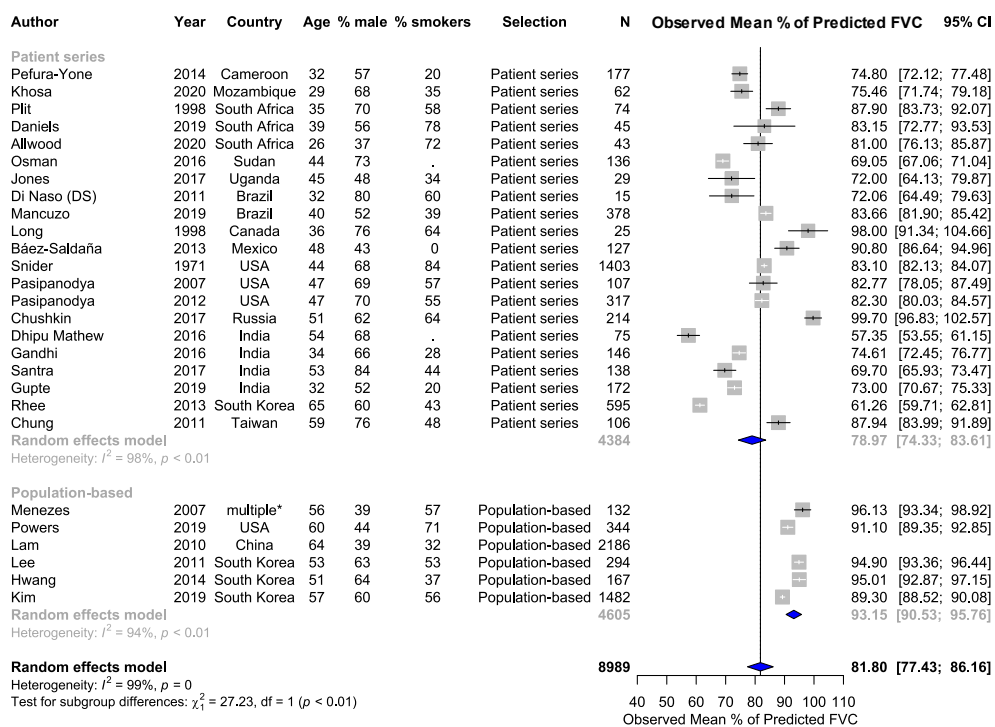

**Figure C. Drug-susceptible tuberculosis patient series vs drug-susceptible tuberculosis population-based studies for obstructive type of lung impairment**

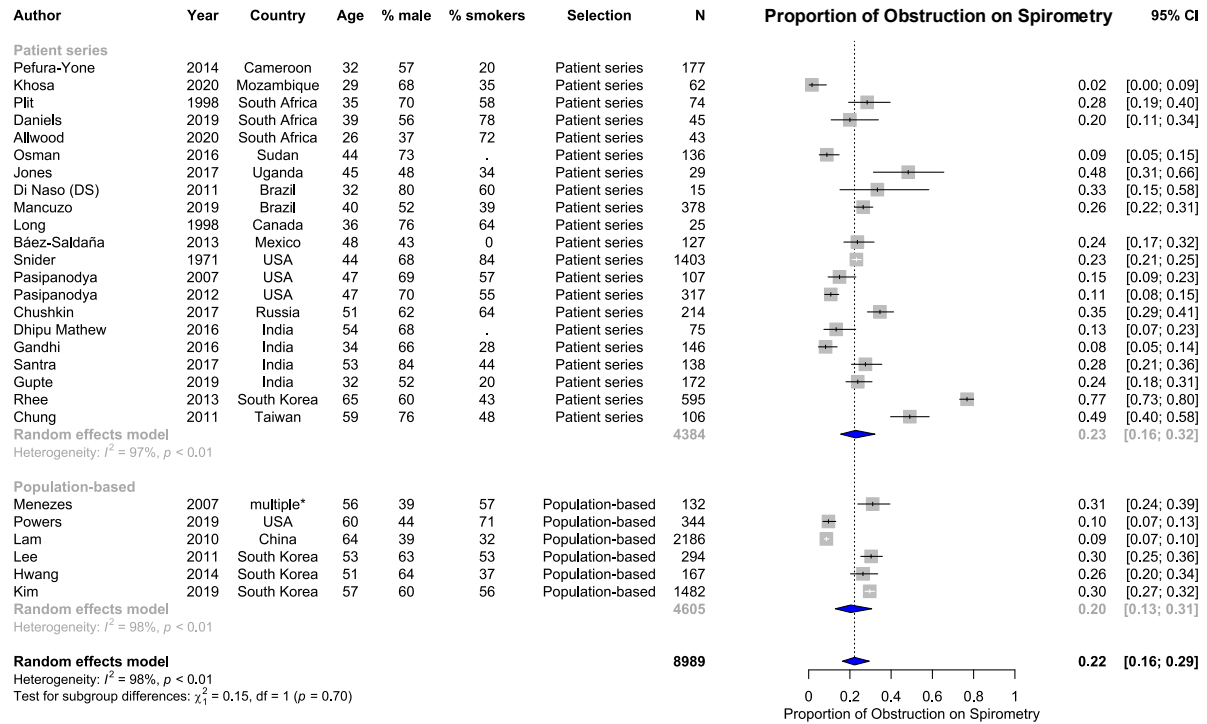

**Figure D.** Drug-susceptible tuberculosis patient series vs drug-susceptible tuberculosis population-based studies for mixed type of lung impairment

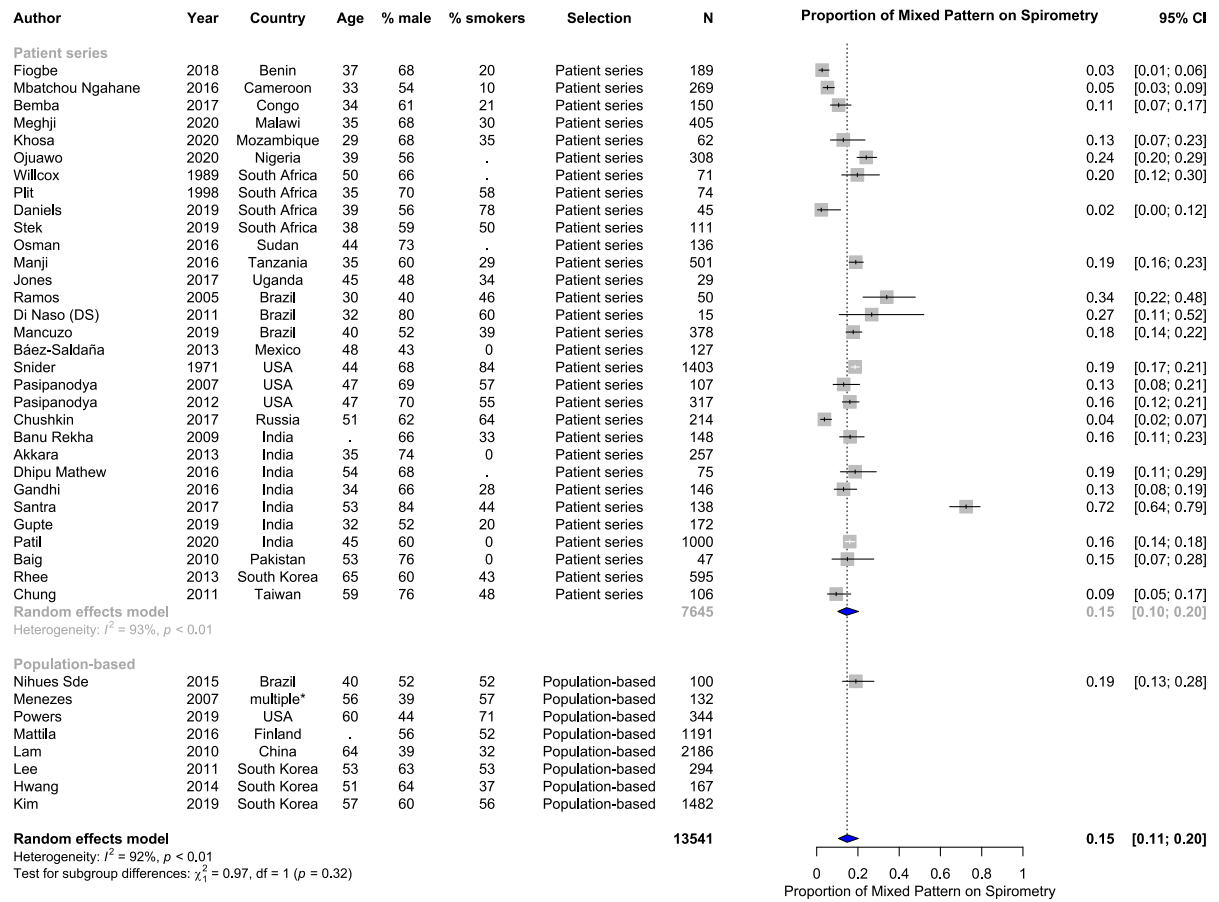

**Figure E.** Drug-susceptible tuberculosis patient series vs drug-susceptible tuberculosis population-based studies for restrictive type of lung impairment

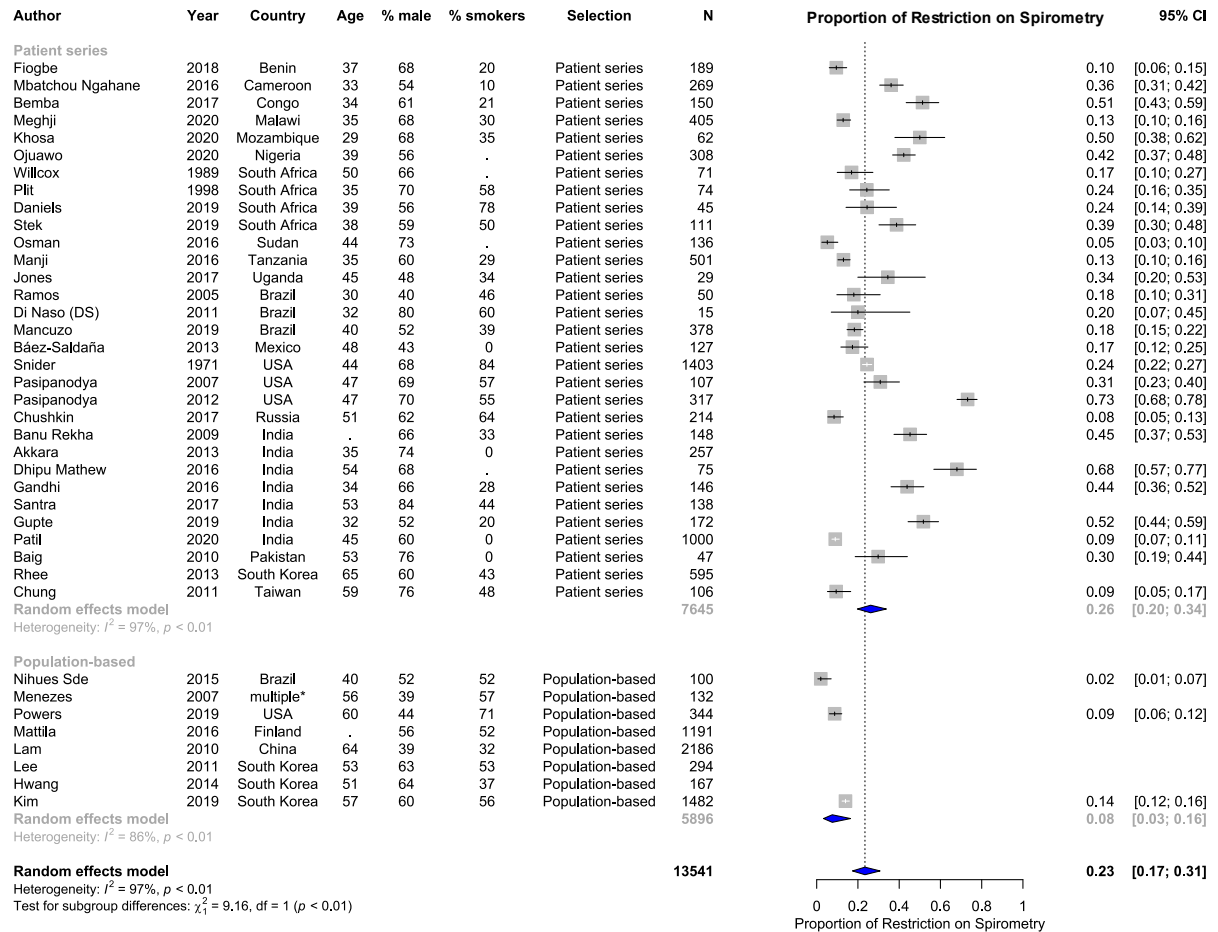

Supplement: ERR-0221-2022.SUPPLEMENT3.pdf [file ERR-0221-2022.SUPPLEMENT3.pdf]
